# Supplementary material
Source: PubMed Central journal article supplement (PMC5850949)
Supplement: NIHMS946394-supplement-Supplement.pdf [file NIHMS946394-supplement-Supplement.pdf]

**Supplementary Table 1. Standard amino acid complete (SACC) medium for culturing *Clostridium sporogenes* ATCC 15579.**

| Ingredients                                               | Concentration in Medium<br>(mg/L or mL of solution) |
|-----------------------------------------------------------|-----------------------------------------------------|
| Resazurin (0.01% w/v stock)                               | 1 mL                                                |
| KH <sub>2</sub> PO <sub>4</sub>                           | 2000                                                |
| K <sub>2</sub> HPO <sub>4</sub>                           | 2000                                                |
| MgCl <sub>2</sub> · 6H <sub>2</sub> O                     | 200                                                 |
| (NH <sub>4</sub> ) <sub>2</sub> SO <sub>4</sub>           | 5000                                                |
| L-glycine                                                 | 75.1                                                |
| L-valine                                                  | 117.2                                               |
| L-leucine                                                 | 131.2                                               |
| L-isoleucine                                              | 131.2                                               |
| L-methionine                                              | 149.2                                               |
| L-histidine                                               | 155.2                                               |
| L-arginine                                                | 174.2                                               |
| L-phenylalanine                                           | 165.2                                               |
| L-tyrosine                                                | 181.2                                               |
| L-tryptophan                                              | 204.23                                              |
| NaHCO <sub>3</sub> (10% w/v stock, pH 7)                  | 25 mL                                               |
| Cysteine HCl (pH 6, 5% w/v stock)                         | 10 mL                                               |
| Glucose Stock (500 mM) or ddH <sub>2</sub> O <sup>a</sup> | 40.0 mL                                             |
| Trace Element Solution (pH 7.0) (g/L) <sup>b</sup>        | 10.0 mL                                             |
| Nitrilotriacetic acid                                     | 12.8                                                |
| FeSO <sub>4</sub> · 7H <sub>2</sub> O                     | 0.1                                                 |
| MnCl <sub>2</sub> · 4H <sub>2</sub> O                     | 0.1                                                 |
| CoCl <sub>2</sub> · 2H <sub>2</sub> O                     | 0.17                                                |
| CaCl <sub>2</sub> · 2H <sub>2</sub> O                     | 0.1                                                 |
| ZnCl <sub>2</sub>                                         | 0.1                                                 |
| CuCl <sub>2</sub>                                         | 0.01                                                |
| H <sub>3</sub> BO <sub>3</sub>                            | 0.01                                                |
| NaMoO <sub>4</sub> · 2H <sub>2</sub> O                    | 0.01                                                |
| NaCl                                                      | 1                                                   |
| NaSeO <sub>3</sub>                                        | 0.017                                               |
| NiCl <sub>2</sub> · 6H <sub>2</sub> O                     | 0.026                                               |
| NaWO <sub>4</sub> · 2H <sub>2</sub> O                     | 0.1                                                 |
| General Vitamin Solution (mg/L) <sup>b</sup>              | 10.0 mL                                             |
| Biotin (B <sub>7</sub> )                                  | 2                                                   |
| Folic acid (B <sub>9</sub> )                              | 2                                                   |
| Pyridoxamine HCl (B <sub>6</sub> )                        | 10                                                  |
| Thiamine HCl (B <sub>1</sub> )                            | 5                                                   |
| Riboflavin HCl (B <sub>2</sub> )                          | 5                                                   |
| Nicotinic acid (B <sub>3</sub> )                          | 5                                                   |
| Pantothenic acid (B <sub>5</sub> )                        | 5                                                   |
| Cyanocobalamin (B <sub>12</sub> )                         | 1                                                   |
| <p>-amino benzoic acid (PABA)</p>                         | 5                                                   |
| Lipoic acid                                               | 5                                                   |

<sup>a</sup>Medium was prepared with either sterile water or glucose depending on the experiment.

<sup>b</sup>Masses listed below indicate the amount of each compound per liter of stock solution.

**Supplementary Table 2. Culturing HMP reference strains.**

| BEI number             | Strain name                                             | Genome Assembly <sup>a</sup>                            | Growth in RCM? |
|------------------------|---------------------------------------------------------|---------------------------------------------------------|----------------|
| <a href="#">HM-36</a>  | <i>Clostridium</i> sp. 7_2_43FAA                        | Genome sequenced, assembled, and annotated              | Yes            |
| <a href="#">HM-79</a>  | <i>Ruminococcaceae</i> bacterium D16                    | Genome sequenced, assembled, and annotated              | No             |
| <a href="#">HM-81</a>  | <i>Acidaminococcus</i> sp. D21                          | Genome sequenced, assembled, and annotated              | Yes            |
| <a href="#">HM-84</a>  | <i>Clostridium</i> sp. D5                               | Genome sequenced, assembled, and annotated              | Yes            |
| <a href="#">HM-85</a>  | <i>Coprobacillus</i> sp. D6 (29_1)                      | Genome sequenced and assembled ( <i>no annotation</i> ) | Yes            |
| <a href="#">HM-173</a> | <i>Clostridium innocuum</i> 6_1_30                      | Genome sequenced ( <i>no assembly or annotation</i> )   | Yes            |
| <a href="#">HM-176</a> | <i>Coprobacillus</i> sp. 8_2_54BFAA                     | Genome sequenced ( <i>no assembly or annotation</i> )   | Yes            |
| <a href="#">HM-178</a> | <i>Eubacterium</i> sp. 3_1_31                           | Genome sequenced, assembled, and annotated              | Yes            |
| <a href="#">HM-182</a> | <i>Lachnospiraceae</i> bacterium 6_1_37FAA              | Genome sequenced, assembled, and annotated              | Yes            |
| <a href="#">HM-184</a> | <i>Propionibacterium</i> sp. 5_U_42AFAA                 | Genome sequenced, assembled, and annotated              | Yes            |
| <a href="#">HM-229</a> | <i>Bacillus smithii</i> 7_3_47FAA                       | Genome sequenced, assembled, and annotated              | No             |
| <a href="#">HM-231</a> | <i>Bacillus</i> sp. 7_6_55CFAA_CT2                      | Genome sequenced, assembled, and annotated              | Yes            |
| <a href="#">HM-287</a> | <i>Clostridium</i> sp. HGF2                             | Genome sequenced, assembled, and annotated              | Yes            |
| <a href="#">HM-303</a> | <i>Clostridium orbiscindens</i> 1_3_50AFAA              | Genome sequenced, assembled, and annotated              | Yes            |
| <a href="#">HM-304</a> | <i>Collinsella</i> sp. 4_8_47FAA                        | Genome sequenced, assembled, and annotated              | Yes            |
| <a href="#">HM-306</a> | [ <i>Clostridium</i> ] <i>clostridioforme</i> 2_1_49FAA | Genome sequenced, assembled, and annotated              | Yes            |
| <a href="#">HM-307</a> | [ <i>Clostridium</i> ] <i>aldenense</i> WAL-18727       | Genome sequenced ( <i>no assembly or annotation</i> )   | Yes            |
| <a href="#">HM-308</a> | <i>Hungatella hathewayi</i> WAL-18680                   | Genome sequenced, assembled, and annotated              | Yes            |
| <a href="#">HM-309</a> | <i>Clostridium symbiosum</i> WAL-14163                  | Genome sequenced, assembled, and annotated              | Yes            |
| <a href="#">HM-310</a> | <i>Clostridium perfringens</i> WAL-14572                | Genome sequenced, assembled, and annotated              | Yes            |
| <a href="#">HM-315</a> | <i>Clostridium citroniae</i> WAL-17108                  | Genome sequenced, assembled, and annotated              | Yes            |
| <a href="#">HM-317</a> | [ <i>Clostridium</i> ] <i>clostridioforme</i> WAL-7855  | Genome sequenced, assembled, and annotated              | Yes            |
| <a href="#">HM-318</a> | [ <i>Clostridium</i> ] <i>bolteae</i> WAL-14578         | Genome sequenced, assembled, and annotated              | Yes            |
| <a href="#">HM-319</a> | [ <i>Clostridium</i> ] <i>symbiosum</i> WAL-14673       | Genome sequenced, assembled, and annotated              | Yes            |
| <a href="#">HM-473</a> | <i>Faecalibacterium</i> cf. <i>prausnitzii</i> KLE1255  | Genome sequenced, assembled, and annotated              | Yes            |
| <a href="#">HM-634</a> | <i>Clostridium</i> sp. L2-50                            | Genome sequenced, assembled, and annotated              | No             |
| <a href="#">HM-635</a> | <i>Clostridium</i> sp. M62/1                            | Genome sequenced, assembled, and annotated              | Yes            |
| <a href="#">HM-793</a> | <i>Coprococcus</i> sp. HPP0074                          | Genome sequenced, assembled, and annotated              | Yes            |
| <a href="#">HM-794</a> | <i>Coprococcus</i> sp. HPP0048                          | Genome sequenced, assembled, and annotated              | Yes            |

|                         |                                               |                                                       |     |
|-------------------------|-----------------------------------------------|-------------------------------------------------------|-----|
| <a href="#">HM-1033</a> | <i>Clostridium</i> sp. KLE 1755               | Genome sequenced, assembled, and annotated            | Yes |
| <a href="#">HM-1038</a> | <i>Clostridium bolteae</i> CC43_001B          | Genome sequenced ( <i>no assembly or annotation</i> ) | Yes |
| <a href="#">HM-1039</a> | <i>Clostridium cadaveris</i> CC40_001C        | Genome sequenced ( <i>no assembly or annotation</i> ) | Yes |
| <a href="#">HM-1040</a> | <i>Clostridium cadaveris</i> CC44_001G        | Genome sequenced ( <i>no assembly or annotation</i> ) | Yes |
| <a href="#">HM-1041</a> | <i>Clostridium cadaveris</i> CC88A            | Genome sequenced ( <i>no assembly or annotation</i> ) | Yes |
| <a href="#">HM-1043</a> | <i>Clostridium lentocellum</i> CC70A          | Genome sequenced ( <i>no assembly or annotation</i> ) | No  |
| <a href="#">HM-1044</a> | <i>Clostridium orbiscindens</i> CC43_001K     | Genome sequenced ( <i>no assembly or annotation</i> ) | Yes |
| <a href="#">HM-1049</a> | <i>Paenibacillus barengoltzii</i> CC33_002B   | Genome sequenced ( <i>no assembly or annotation</i> ) | Yes |
| <a href="#">HM-1051</a> | <i>Peptostreptococcus anaerobius</i> CC14N    | Genome sequenced ( <i>no assembly or annotation</i> ) | Yes |
| <a href="#">HM-1056</a> | <i>Ruminococcus gnavus</i> CC55_001C          | Genome sequenced, assembled, and annotated            | Yes |
| N/A                     | <i>Clostridium difficile</i> 630 $\Delta$ Erm | Genome sequenced, assembled, and annotated            | Yes |
| N/A                     | <i>Clostridium sporogenes</i> ATCC 15579      | Genome sequenced, assembled, and annotated            | Yes |

<sup>a</sup> Genome finishing status for relevant HMP reference genomes at the onset of this study.

**Supplementary Table 3. Metabolite levels in resting cell suspensions of *C. sporogenes* WT and mutants.**

| Substrate Added | Metabolite detected <sup>a</sup> |                 |                |                  |              |                      |                     |                      |            |                 |                |                 |             |
|-----------------|----------------------------------|-----------------|----------------|------------------|--------------|----------------------|---------------------|----------------------|------------|-----------------|----------------|-----------------|-------------|
|                 | Phenyl-alanine                   | Phenyl-pyruvate | Phenyl-lactate | Phenyl-lacrylate | Tyrosine     | 4-OH-phenyl-pyruvate | 4-OH-phenyl-lactate | 4-OH-phenyl-acrylate | Tryptophan | Indole-pyruvate | Indole-lactate | Indole-acrylate |             |
| WT              | Phenylpyruvate                   | N.D.            | 1650 ± 130     | 4.39 ± 0.16      | 4.31 ± 0.091 |                      |                     |                      |            |                 |                |                 |             |
|                 | Phenyllactate                    | 55 ± 9.9        | 40 ± 9.1       | 672 ± 90         | N.D.         |                      |                     |                      |            |                 |                |                 |             |
|                 | Phenylacrylate                   | N.D.            | N.D.           | N.D.             | N.D.         |                      |                     |                      |            |                 |                |                 |             |
|                 | Phenylpropionate                 | 1270 ± 290      | 1080 ± 460     | 720 ± 320        | 810 ± 290    |                      |                     |                      |            |                 |                |                 |             |
|                 | Phenylacetate                    | 31.7 ± 7.0      | 93.3 ± 17      | N.D.             | N.D.         |                      |                     |                      |            |                 |                |                 |             |
|                 | 4-OH-phenylpyruvate              |                 |                |                  |              | N.D.                 | 909 ± 200           | N.D.                 | N.D.       |                 |                |                 |             |
|                 | 4-OH-phenyllactate               |                 |                |                  |              | 36.2 ± 10            | 12.2 ± 1.1          | 3010 ± 780           | N.D.       |                 |                |                 |             |
|                 | 4-OH-phenylacrylate              |                 |                |                  |              | N.D.                 | N.D.                | N.D.                 | N.D.       |                 |                |                 |             |
|                 | 4-OH-phenylpropionate            |                 |                |                  |              | 492 ± 203            | 942 ± 38            | 220 ± 64             | 579 ± 2.5  |                 |                |                 |             |
|                 | 4-OH-phenylacetate               |                 |                |                  |              | 18.7 ± 9.2           | 27.0 ± 11           | N.D.                 | N.D.       |                 |                |                 |             |
|                 | Indolepyruvate                   |                 |                |                  |              |                      |                     |                      |            | N.D.            | N.D.           | N.D.            | N.D.        |
|                 | Indolelactate                    |                 |                |                  |              |                      |                     |                      |            | 11.6 ± 1.6      | 51.8 ± 4.2     | 466 ± 33        | N.D.        |
|                 | Indoleacrylate                   |                 |                |                  |              |                      |                     |                      |            | N.D.            | N.D.           | N.D.            | 1020 ± 93   |
|                 | Indolepropionate                 |                 |                |                  |              |                      |                     |                      |            | 18.1 ± 3.1      | 19.2 ± 1.3     | 97.7 ± 5.2      | 29.9 ± 0.99 |
| Indoleacetate   |                                  |                 |                |                  |              |                      |                     |                      | N.D.       | 70.4 ± 1.5      | N.D.           | N.D.            |             |
| porA            | Phenylpyruvate                   | 14.1 ± 2.8      | 1840 ± 270     | 5.76 ± 0.34      | 4.20 ± 0.070 |                      |                     |                      |            |                 |                |                 |             |
|                 | Phenyllactate                    | 79.7 ± 24       | 190 ± 22       | 303 ± 60         | N.D.         |                      |                     |                      |            |                 |                |                 |             |
|                 | Phenylacrylate                   | N.D.            | N.D.           | N.D.             | N.D.         |                      |                     |                      |            |                 |                |                 |             |
|                 | Phenylpropionate                 | 452 ± 280       | 1390 ± 370     | 744 ± 180        | 880 ± 110    |                      |                     |                      |            |                 |                |                 |             |
|                 | Phenylacetate                    | N.D.            | N.D.           | N.D.             | N.D.         |                      |                     |                      |            |                 |                |                 |             |

|             |                       |            |            |              |              |            |            |            |              |            |
|-------------|-----------------------|------------|------------|--------------|--------------|------------|------------|------------|--------------|------------|
|             | 4-OH-phenylpyruvate   |            | 9.57 ± 3.4 | 2010 ± 990   | 19.2 ± 6.0   | N.D.       |            |            |              |            |
|             | 4-OH-phenyllactate    |            | 48 ± 9.7   | 60.1 ± 10    | 2976 ± 740   | N.D.       |            |            |              |            |
|             | 4-OH-phenylacrylate   |            | N.D.       | N.D.         | 3.96 ± 0.65  | N.D.       |            |            |              |            |
|             | 4-OH-phenylpropionate |            | 711 ± 230  | 157 ± 130    | 353 ± 99     | 868 ± 220  |            |            |              |            |
|             | 4-OH-phenylacetate    |            | N.D.       | 3.07 ± 0.86  | N.D.         | N.D.       |            |            |              |            |
|             | Indolepyruvate        |            |            |              |              |            | N.D.       | N.D.       | N.D.         | N.D.       |
|             | Indolelactate         |            |            |              |              |            | 29.6 ± 5.4 | 65.3 ± 8.3 | 498 ± 51     | N.D.       |
|             | Indoleacrylate        |            |            |              |              |            | N.D.       | N.D.       | 0.447 ± 0.16 | 1200 ± 57  |
|             | Indolepropionate      |            |            |              |              |            | 18.7 ± 3.5 | 21.9 ± 1.8 | 88.8 ± 12    | 37.0 ± 1.5 |
|             | Indoleacetate         |            |            |              |              |            | N.D.       | 77.4 ± 7.0 | N.D.         | N.D.       |
| <i>fidC</i> | Phenylpyruvate        | N.D.       | 2140 ± 140 | 4.29 ± 0.073 | 4.24 ± 0.079 |            |            |            |              |            |
|             | Phenyllactate         | 136 ± 23   | 1330 ± 48  | 1180 ± 350   | 2.35 ± 0.99  |            |            |            |              |            |
|             | Phenylacrylate        | N.D.       | N.D.       | N.D.         | 210 ± 40     |            |            |            |              |            |
|             | Phenylpropionate      | N.D.       | N.D.       | N.D.         | 1140 ± 290   |            |            |            |              |            |
|             | Phenylacetate         | 21.1 ± 6.7 | 91.3 ± 16  | N.D.         | N.D.         |            |            |            |              |            |
|             | 4-OH-phenylpyruvate   |            |            |              |              | N.D.       | 1390 ± 490 | N.D.       | N.D.         |            |
|             | 4-OH-phenyllactate    |            |            |              |              | 336 ± 94   | 76.8 ± 16  | 2110 ± 550 | N.D.         |            |
|             | 4-OH-phenylacrylate   |            |            |              |              | N.D.       | N.D.       | N.D.       | 372 ± 50     |            |
|             | 4-OH-phenylpropionate |            |            |              |              | N.D.       | N.D.       | N.D.       | 912 ± 150    |            |
|             | 4-OH-phenylacetate    |            |            |              |              | 6.48 ± 4.0 | 9.11 ± 2.3 | N.D.       | N.D.         |            |
|             | Indolepyruvate        |            |            |              |              |            |            |            | N.D.         | N.D.       |
|             | Indolelactate         |            |            |              |              |            | 46.2 ± 7.3 | 85.4 ± 7.4 | 573 ± 19     | N.D.       |

|               |                       |            |            |              |              |            |             |              |             |
|---------------|-----------------------|------------|------------|--------------|--------------|------------|-------------|--------------|-------------|
|               | Indoleacrylate        |            |            |              |              | N.D.       | N.D.        | N.D.         | 1230 ± 40   |
|               | Indolepropionate      |            |            |              |              | N.D.       | N.D.        | N.D.         | 2.91 ± 0.24 |
|               | Indoleacetate         |            |            |              |              | N.D.       | 89.5 ± 2.7  | N.D.         | N.D.        |
| <i>acdA</i>   | Phenylpyruvate        | N.D.       | 1650 ± 140 | 4.25 ± 0.054 | 4.06 ± 0.006 |            |             |              |             |
|               | Phenyllactate         | 100 ± 15   | 594 ± 120  | 870 ± 210    | N.D.         |            |             |              |             |
|               | Phenylacrylate        | N.D.       | N.D.       | N.D.         | N.D.         |            |             |              |             |
|               | Phenylpropionate      | 48 ± 4.2   | 80 ± 9.1   | N.D.         | 740 ± 150    |            |             |              |             |
|               | Phenylacetate         | 17.7 ± 4.4 | 72.7 ± 13  | N.D.         | N.D.         |            |             |              |             |
|               | 4-OH-phenylpyruvate   |            |            |              |              | N.D.       | 1590 ± 720  | N.D.         | N.D.        |
|               | 4-OH-phenyllactate    |            |            |              |              | 282 ± 46   | 44.5 ± 10   | 2460 ± 840   | N.D.        |
|               | 4-OH-phenylacrylate   |            |            |              |              | N.D.       | N.D.        | N.D.         | N.D.        |
|               | 4-OH-phenylpropionate |            |            |              |              | N.D.       | N.D.        | N.D.         | 512 ± 140   |
|               | 4-OH-phenylacetate    |            |            |              |              | 5.43 ± 1.9 | 10.2 ± 2.0  | N.D.         | N.D.        |
|               | Indolepyruvate        |            |            |              |              |            |             |              |             |
|               | Indolelactate         |            |            |              |              |            |             |              |             |
|               | Indoleacrylate        |            |            |              |              |            |             |              |             |
|               | Indolepropionate      |            |            |              |              |            |             |              |             |
| Indoleacetate |                       |            |            |              |              |            |             |              |             |
|               |                       |            |            |              |              | N.D.       | N.D.        | N.D.         | N.D.        |
|               |                       |            |            |              |              | 34.9 ± 3.2 | 73.3 ± 0.67 | 554 ± 31     | N.D.        |
|               |                       |            |            |              |              |            |             |              | 1230 ± 96   |
|               |                       |            |            |              |              |            |             | 1.80 ± 0.068 | 10.6 ± 0.61 |
|               |                       |            |            |              |              |            |             | 82.1 ± 5.9   | N.D.        |
|               |                       |            |            |              |              |            |             |              |             |
| <i>fidH</i>   | Phenylpyruvate        | N.D.       | 1670 ± 60  | 4.54 ± 0.31  | 4.38 ± 0.039 |            |             |              |             |
|               | Phenyllactate         | 7.83 ± 2.0 | 31.6 ± 1.1 | 358 ± 32     | N.D.         |            |             |              |             |
|               | Phenylacrylate        | N.D.       | N.D.       | N.D.         | 193 ± 25     |            |             |              |             |
|               | Phenylpropionate      | 68.4 ± 22  | 173 ± 9.6  | 331 ± 210    | 734 ± 120    |            |             |              |             |

|                       |              |               |             |      |               |               |                |                                        |
|-----------------------|--------------|---------------|-------------|------|---------------|---------------|----------------|----------------------------------------|
| Phenylacetate         | 75.5 ±<br>12 | 1010 ±<br>100 | 14 ±<br>1.0 | N.D. |               |               |                |                                        |
| 4-OH-phenylpyruvate   |              |               |             |      | N.D.          | 1460 ±<br>410 | N.D.           | N.D.                                   |
| 4-OH-phenyllactate    |              |               |             |      | N.D.          | N.D.          | 1300 ±<br>120  | N.D.                                   |
| 4-OH-phenylacrylate   |              |               |             |      | N.D.          | N.D.          | 228 ±<br>49    | N.D.                                   |
| 4-OH-phenylpropionate |              |               |             |      | N.D.          | N.D.          | 105 ±<br>15    | 460 ±<br>110                           |
| 4-OH-phenylacetate    |              |               |             |      | 60.2 ±<br>2.6 | 57.5 ±<br>12  | 11.8 ±<br>1.8  | N.D.                                   |
| Indolepyruvate        |              |               |             |      |               |               |                | N.D. N.D. N.D. N.D.                    |
| Indolelactate         |              |               |             |      |               |               |                | N.D. 0.864 ±<br>0.54 408 ±<br>19 N.D.  |
| Indoleacrylate        |              |               |             |      |               |               |                | N.D. N.D. 1.56 ±<br>0.31 1120 ±<br>180 |
| Indolepropionate      |              |               |             |      |               | 2.93 ± 0.18   | 3.86 ±<br>0.20 | 162 ±<br>14 22.0 ±<br>2.7              |
| Indoleacetate         |              |               |             |      |               |               |                | N.D. 81.3 ±<br>8.7 N.D. N.D.           |

<sup>a</sup> Experiments were performed in triplicate and data are presented as means ± standard errors from the mean.

**Supplementary Table 4.** Summary of studies identifying AAA oxidative and reductive metabolites in host body fluids

| Metabolite                | Alternative name    | Metabolomics studies <sup>a,b</sup> |                         |                                      |                   |                                       | Comments                             |
|---------------------------|---------------------|-------------------------------------|-------------------------|--------------------------------------|-------------------|---------------------------------------|--------------------------------------|
|                           |                     | Wikoff <sup>c</sup>                 | Aronov <sup>c</sup>     | Guo                                  | Spaapen           | Loke                                  |                                      |
| Phenylacetate             |                     | <b>P<sub>Gly</sub></b>              | <b>P<sub>Gln</sub></b>  | P <sub>free</sub> , P <sub>Gln</sub> | n.d.              | P <sub>free</sub> , U <sub>free</sub> | Elevated in Phenylketonuria patients |
| Phenylpyruvate            |                     | n.d.                                | n.d.                    | n.d.                                 | n.d.              | n.d.                                  |                                      |
| Phenyllactate             |                     | n.d.                                | n.d.                    | P <sub>free</sub>                    | U <sub>free</sub> | n.d.                                  |                                      |
| Phenylacrylate            | <i>t</i> -cinnamate | <b>P<sub>Gly</sub></b>              | <b>P<sub>Gly</sub></b>  | P <sub>Gly</sub>                     | n.d.              | U <sub>free</sub>                     | Elevated in Tyrosinemia patients     |
| Phenylpropionate          | hydrocinnamate      | <b>P<sub>Gly</sub></b>              | n.d.                    | P <sub>free</sub>                    | n.d.              | n.d.                                  |                                      |
| 4-hydroxyphenylacetate    |                     | n.d.                                | n.d.                    | P <sub>free</sub>                    | n.d.              | U <sub>free</sub>                     |                                      |
| 4-hydroxyphenylpyruvate   |                     | n.d.                                | n.d.                    | n.d.                                 | n.d.              | n.d.                                  |                                      |
| 4-hydroxyphenyllactate    |                     | n.d.                                | n.d.                    | P <sub>free</sub>                    | U <sub>free</sub> | n.d.                                  |                                      |
| 4-hydroxyphenylacrylate   | <i>p</i> -coumarate | n.d.                                | n.d.                    | n.d.                                 | n.d.              | P <sub>free</sub>                     |                                      |
| 4-hydroxyphenylpropionate |                     | n.d.                                | n.d.                    | P <sub>free</sub>                    | n.d.              | P <sub>free</sub> , U <sub>free</sub> |                                      |
| Indoleacetate             |                     | n.d.                                | <b>P<sub>free</sub></b> | P <sub>free</sub> , P <sub>Gln</sub> | n.d.              | n.d.                                  |                                      |
| Indolepyruvate            |                     | n.d.                                | n.d.                    | n.d.                                 | n.d.              | n.d.                                  |                                      |
| Indolelactate             |                     | n.d.                                | P <sub>free</sub>       | P <sub>free</sub>                    | n.d.              | n.d.                                  |                                      |
| Indoleacrylate            |                     | n.d.                                | n.d.                    | P <sub>free</sub>                    | n.d.              | n.d.                                  |                                      |
| Indolepropionate          |                     | <b>P<sub>free</sub></b>             | <b>P<sub>free</sub></b> | P <sub>free</sub>                    | n.d.              | n.d.                                  |                                      |

<sup>a</sup> Letters indicate whether compounds were detected in plasma (P) or urine (U), and subscripts indicate whether they were detected as free acids (free), glycine conjugates (Gly), or glutamine conjugates (Gln).

<sup>b</sup> References are as follows: Wikoff<sup>27</sup>, Aronov<sup>28</sup>, Guo<sup>29</sup>, Spaapen<sup>30</sup>, Loke<sup>31</sup>.

<sup>c</sup> Compounds indicated in bold font were elevated in conventional vs. germ free mice (Wikoff), or in humans with intact colons vs. colectomy patients (Aronov).



**Supplementary Table 5. Intron retargeting and sequencing primers for Clostron disruptions in *Clostridium sporogenes* ATCC 15579.**

| Gene (Locus ID)            | Targeted Region <sup>a</sup> | Sequencing Primers <sup>b</sup>                                                  |
|----------------------------|------------------------------|----------------------------------------------------------------------------------|
| <i>fldC</i> (CLOSPO_00311) | 561a                         | 311F: TGGGGAATATGATATGTTGTCTGGCATGATG<br>311R: TGTTCAAGCTAATCTATCCATTGGTGTATTCGC |
| <i>acdA</i> (CLOSPO_00312) | 775s                         | 312F: TCGCAAAAACAGATATGAGCA<br>312R: ACCACCATGAATTTGTAGTGC                       |
| <i>fldH</i> (CLOSPO_00316) | 736s                         | 316F: TAGGAGTTATAGGAACTGGAA<br>316R: TTGGTTTTTACAAGTTCCTT                        |
| <i>porA</i> (CLOSPO_00147) | 1001a                        | 147F: TGGCTAAAGAAGAAGGTATGA<br>147R: TCAAACATATCACAGGCAAAA                       |
| <i>fldZ</i> (CLOSPO_02780) | 1546s                        | 2780F: TTGGCGGAAATATTGTACCAG<br>2780R: TTTAGCTACTTCATATGCACT                     |

<sup>a</sup> Targeting regions were designed using the Intron design tool on the Clostron website (<http://www.clostron.com/clostron2.php>). The regions listed indicate the nucleotide position within the gene where the intron is inserted and the a/s designation indicates whether the intron integrates in the antisense or sense strand.

<sup>b</sup> Primers were designed to amplify the region containing the expected intron after integration. Primers were synthesized by Integrated DNA Technologies (Coralville, IA).

**Supplementary Table 6. Ion transitions and instrument parameters for AAA metabolite detection.**

| Compound              | Precursor<br>( <i>m/z</i> ) | Product<br>( <i>m/z</i> ) | Fragmentor<br>(V) | Collision Energy<br>(eV) |
|-----------------------|-----------------------------|---------------------------|-------------------|--------------------------|
| Phenylalanine         |                             |                           |                   |                          |
| Phenylpyruvate        | 163                         | 91.1                      | 65                | 5                        |
| Phenyllactate         | 165.1                       | 147.1                     | 90                | 9                        |
| Phenylacrylate        | 147                         | 103                       | 70                | 9                        |
| Phenylpropionate      | 149.1                       | 105.1                     | 80                | 9                        |
| Phenylacetate         | 135                         | 91.1                      | 45                | 5                        |
| Tyrosine              |                             |                           |                   |                          |
| 4-OH-Phenylpyruvate   | 179                         | 107                       | 69                | 5                        |
| 4-OH-Phenyllactate    | 181.1                       | 162.9                     | 90                | 9                        |
| 4-OH-Phenylacrylate   | 163                         | 119                       | 76                | 12                       |
| 4-OH-Phenylpropionate | 165.1                       | 59.1                      | 96                | 9                        |
| 4-OH-Phenylacetate    | 151                         | 107                       | 45                | 5                        |
| Tryptophan            |                             |                           |                   |                          |
| Indolepyruvate        | 202.1                       | 174                       | 66                | 1                        |
| Indolelactate         | 204.1                       | 158                       | 90                | 13                       |
| Indoleacrylate        | 186.1                       | 142                       | 74                | 13                       |
| Indolepropionate      | 188.1                       | 59.1                      | 90                | 13                       |
| Indoleacetate         | 174.1                       | 130                       | 74                | 5                        |

**Supplementary Table 7. Summary of genome assemblies**

|                                                            | <i>C. bolteae</i><br>CC43_001B | <i>C. cadaveris</i> CC40<br>001C | <i>C. cadaveris</i><br>CC44_001G | <i>C. cadaveris</i> CC88A | <i>P. anaerobius</i><br>CC14N |
|------------------------------------------------------------|--------------------------------|----------------------------------|----------------------------------|---------------------------|-------------------------------|
| BioProject Accession Number                                | PRJNA71569                     | PRJNA71541                       | PRJNA71543                       | PRJNA71545                | PRJNA71563                    |
| Combined length                                            | 6,094,255 bp                   | 3,754,827 bp                     | 3,562,150 bp                     | 3,556,482 bp              | 2,043,901 bp                  |
| Percent GC content                                         | 49.18%                         | 31.03%                           | 30.97%                           | 31.51%                    | 30.51%                        |
| Number of sequences                                        | 102                            | 221                              | 142                              | 78                        | 18                            |
| Mean sequence length                                       | 59,748 bp                      | 16,990 bp                        | 25,086 bp                        | 45,596 bp                 | 113,550 bp                    |
| Sequence n50                                               | 1,681,030 bp                   | 159,835 bp                       | 307,414 bp                       | 367,796 bp                | 1,583,849 bp                  |
| Sequence n90                                               | 298,438 bp                     | 33,731 bp                        | 58,107 bp                        | 55,850 bp                 | 275,990 bp                    |
| Longest sequence                                           | 2,058,090 bp                   | 371,381 bp                       | 485,405 bp                       | 631,552 bp                | 1,583,849 bp                  |
| Average coverage depth                                     | 256X                           | 461X                             | 556X                             | 569X                      | 366X                          |
| % Corrected Reads aligned                                  | 95.5%                          | 95.0%                            | 95.4%                            | 95.9%                     | 94.2%                         |
| Phenylacetate gene cluster average coverage depth          | NA                             | 425X                             | 629X                             | 607X                      | 461X                          |
| <i>rpoB</i> average coverage depth                         | 290X                           | 445X                             | 684X                             | 642X                      | 496X                          |
| Phenylacetate dehydratase cluster GenBank accession number | N/A                            | BK010268                         | BK010335                         | BK010336                  | BK010337                      |
| RpoB GenBank accession number                              | BK010331                       | BK010269                         | BK010332                         | BK010333                  | BK010334                      |

### Supplementary Table 8. Oligonucleotide primers for qPCR analysis of bacterial community membership.

| Organism                                     | Genome Region <sup>a</sup> | qPCR Primers                                                           |
|----------------------------------------------|----------------------------|------------------------------------------------------------------------|
| <i>Bacteroides vulgatus</i> ATCC 8482        | 1252631 - 1252765          | Bvu_qPCR_F: TCCGGCTCTGCTCGTCAAGA<br>Bvu_qPCR_R: GCTTCCACTGCCTGCAACCA   |
| <i>Bacteroides thetaiotaomicron</i> VPI-5482 | 16052 - 16154              | Bth_qPCR_F: CGGGATTGTTGCGGCAGACA<br>Bth_qPCR_R: CGCGTTCATCCGTGCCTTCA   |
| <i>Parabacteroides distasonis</i> ATCC 8503  | 375224 - 375316            | Pdi_qPCR_F: CGGTTTTCGTGCGGGTGATGA<br>Pdi_qPCR_R: CGGAAGGTGGCGTTCGTGTT  |
| <i>Edwardsiella tarda</i> ATCC 23685         | 526079 - 526227            | Eta_qPCR_F: ACGCCCACTCACGGATCTGA<br>Eta_qPCR_R: ACTCCCGCTCGCTCAGGTTA   |
| <i>Eubacterium rectale</i> ATCC 33656        | 1863134 - 1863277          | Ere_qPCR_F: GGTGCAGGCGAGTTTCCCTT<br>Ere_qPCR_R: GCCAAACAGCCCCGACATCA   |
| <i>Bifidobacterium breve</i> UCC2003         | 1357556 - 1357701          | Bbr_qPCR_F: ACCCCACGCACACCAATCAC<br>Bbr_qPCR_R: GACCGCGCCGATGAAGTTGA   |
| <i>Clostridium scindens</i> ATCC 35704       | 863 - 978                  | Csc_qPCR_F: TTCAGGAGAAATGCCAGCCAGT<br>Csc_qPCR_R: GTTCTGCCACGGTCGTTAGC |
| <i>Clostridium sporogenes</i> ATCC 15579     | 197533 - 197672            | Csp_qPCR_F: TTGGCTCTGCACCGGGAATC<br>Csp_qPCR_R: CTGCAAACGCCGTCCCTCTT   |

<sup>a</sup>qPCR primers were designed using Geneious v10.1.3 with the integrated Primer3 tool. The regions were designed to represent single copy genes and to avoid dynamic regions of the genome (e.g., not within a mobile genetic element). The primers were then used to BLAST against the other organisms in the community to ensure that no cross-priming would occur.

## Supplemental References

- 27 Wikoff, W. R. *et al.* Metabolomics analysis reveals large effects of gut microflora on mammalian blood metabolites. *Proceedings of the National Academy of Sciences of the United States of America* **106**, 3698-3703, doi:10.1073/pnas.0812874106 (2009).
- 28 Aronov, P. A. *et al.* Colonic contribution to uremic solutes. *Journal of the American Society of Nephrology : JASN* **22**, 1769-1776, doi:10.1681/ASN.2010121220 (2011).
- 29 Guo, L. *et al.* Plasma metabolomic profiles enhance precision medicine for volunteers of normal health. *Proceedings of the National Academy of Sciences of the United States of America* **112**, E4901-4910, doi:10.1073/pnas.1508425112 (2015).
- 30 Spaapen, L. J., Ketting, D., Wadman, S. K., Bruinvis, L. & Duran, M. Urinary D-4-hydroxyphenyllactate, D-phenyllactate and D-2-hydroxyisocaproate, abnormalities of bacterial origin. *Journal of inherited metabolic disease* **10**, 383-390, doi:10.1007/BF01799981 (1987).
- 31 Loke, W. M. *et al.* A metabolite profiling approach to identify biomarkers of flavonoid intake in humans. *The Journal of nutrition* **139**, 2309-2314, doi:10.3945/jn.109.113613 (2009).
